# Supplementary material for: Spectrum and Frequency of Tumors, Cancer Risk and Survival in Chilean Families with Lynch Syndrome: Experience of the Implementation of a Registry
Source: MDPI journal article supplement (doi:10.3390/jcm9061861), 2020-06-15
Supplement: s1 [file s1]

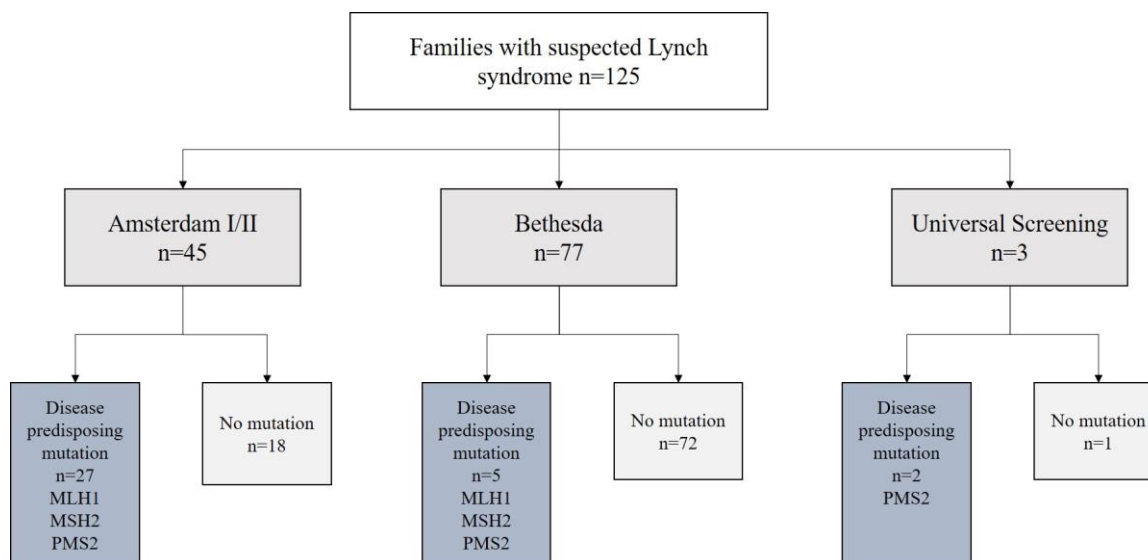

**Figure S1.** Flowchart of Chilean families from Hereditary Colorectal Cancer Registry in Clínica Las Condes.

**Table S1.** Summary of synchronous and metachronous neoplasms in 57 patients from Group 1.

| Synchronous and metachronous neoplasms                                 | Number of patients (%) |
|------------------------------------------------------------------------|------------------------|
| Two                                                                    | 36 (16.9)              |
| Three                                                                  | 9 (4.1)                |
| Four                                                                   | 8 (3.6)                |
| Five                                                                   | 3 (1.4)                |
| Six                                                                    | 1 (0.5)                |
| Localization                                                           | Number of patients     |
| Colorectal (2–5 tumors)                                                | 14                     |
| Colorectal and uterus                                                  | 8                      |
| Colorectal and skin                                                    | 7                      |
| Colorectal and ovary                                                   | 3                      |
| Colorectal and stomach                                                 | 3                      |
| Colorectal, breast and uterus                                          | 3                      |
| Colorectal and breast                                                  | 1                      |
| Colorectal and kidney/ureter/bladder                                   | 2                      |
| Colorectal, kidney/bladder and small bowel                             | 1                      |
| Colorectal and cervix                                                  | 1                      |
| Colorectal and pancreas                                                | 1                      |
| Colorectal, pancreas and breast                                        | 1                      |
| Colorectal, pancreas and skin                                          | 1                      |
| Colorectal and prostate                                                | 1                      |
| Colorectal and soft tissue                                             | 1                      |
| Colorectal, uterus, ovary and kidney                                   | 1                      |
| Stomach (2 tumors)                                                     | 1                      |
| Uterus and ovary                                                       | 1                      |
| Uterus and kidney                                                      | 1                      |
| Uterus and breast                                                      | 1                      |
| Uterus and leukemia                                                    | 1                      |
| Uterus and gallbladder                                                 | 1                      |
| Breast, skin, kidney/bladder and head and neck                         | 1                      |
| Time of metachronous cancer diagnosis since the first neoplasm (years) | n                      |
| 1–10                                                                   | 31                     |
| 11–20                                                                  | 18                     |
| 21–30                                                                  | 20                     |
| 31–40                                                                  | 4                      |
| 41–50                                                                  | 1                      |

**Table S2.** Summary of mean age at diagnosis and range of major neoplasms observed in LS Chilean families (Group 1).

| Neoplasm              | <i>n</i> | Mean age at diagnosis<br>(years) | Range<br>(years) |
|-----------------------|----------|----------------------------------|------------------|
| Brain                 | 5        | 18.0                             | 10–36            |
| CRC                   | 133      | 43.4                             | 18–89            |
| Ovary                 | 7        | 44.9                             | 36–54            |
| Uterus                | 26       | 48.5                             | 25–67            |
| Pancreas              | 6        | 52.2                             | 17–77            |
| Stomach               | 13       | 53.7                             | 32–70            |
| Breast                | 13       | 58.5                             | 32–84            |
| Skin                  | 9        | 63.8                             | 28–88            |
| Kidney/ureter/bladder | 10       | 64.9                             | 52–78            |
